# Supplementary material
Source: PubMed Central journal article supplement (PMC8776567)
Supplement: NIHMS1765901-supplement-Supplement.pdf [file NIHMS1765901-supplement-Supplement.pdf]

**Screening for autosomal recessive and X-linked conditions during pregnancy and preconception: a practice resource of the American College of Medical Genetics and Genomics (ACMG)**

**Supplemental Material**

**Methods**

**Rationale for Tier 3 screening**

**Figure S1.** The relationship between Carrier Frequency and identification of an At-Risk couple.

**Technology Considerations**

**Table S1.** Autosomal recessive conditions recommended for screening and scored as definitive in ClinGen, listed as a reportable secondary finding, included in newborn screening programs.

**Table S2.** X-linked conditions listed in OMIM (November 30, 2020) and initially considered for screening

**Methods: Literature search of publically available databases**

We performed literature searches using the terms “genetic carrier screening and expanded” after examination of the hierarchy of terms in Medical Subjects Headings (MeSH). We searched PubMed multiple times between September 22, 2020 and December 20, 2020 using the year range 2010 through 2020; 262 results were returned. A second strategy performed over the same time-period incorporated the term “utility” and used the same year filter, which returned 67 results. This was further refined to exclude reviews (“not (reviews)”), which yielded 57 results. The abstracts of these search results were reviewed. Snowball sampling of the

articles' reference list identified additional relevant articles that fell outside the date range of 2010 through 2020.

Several publicly available databases were used to inform questions 5 and 6. These are shown in **Box S1**. Group consensus informed all ACMG recommendations.

| <b>Box S1. Publicly Available Data Bases Utilized</b> |                                                                                                             |
|-------------------------------------------------------|-------------------------------------------------------------------------------------------------------------|
| <b>Name</b>                                           | <b>URL</b>                                                                                                  |
| gnomAD v 2.1.1                                        | <a href="https://gnomad.broadinstitute.org/">https://gnomad.broadinstitute.org/</a>                         |
| OMIM                                                  | <a href="https://omim.org/">https://omim.org/</a>                                                           |
| Orphanet                                              | <a href="https://www.orpha.net/consor/cgi-bin/index.php">https://www.orpha.net/consor/cgi-bin/index.php</a> |
| MedlinePlus                                           | <a href="https://medlineplus.gov/">https://medlineplus.gov/</a>                                             |
| ClinGen                                               | <a href="https://www.clinicalgenome.org/">https://www.clinicalgenome.org/</a>                               |

### **Rationale for $\geq 1/200$ autosomal recessive genes included in Tier 3 screening**

The rationale for selecting  $\geq 1/200$  rests on two studies. One study utilized a diagnostic laboratory's database,<sup>1</sup> the other utilized gnomAD version 2.0.2 a large-scale dataset of unrelated individuals.<sup>2,3</sup> This version of gnomAD consists of 123,136 exome sequencing samples. Variant analysis, within this version, is stratified for seven populations: African/African American, Ashkenazi Jewish, East Asian, Finnish, Hispanic/Admixed American, Non-Finnish European, and South Asian. In this report Finnish were excluded since they represent a very small portion of the US population and a theoretical US population was constructed based on census data. gnomAD allowed investigators to view pathogenic and likely pathogenic allele frequencies within 415 autosomal recessive genes (referenced in ClinVar) by ancestry. Both studies demonstrated a log curve relationship with carrier frequency or total number of screened genes on the X-axis and identified at-risk couples or carriers on the Y-axis (**Figure S1**). At-risk couples (both partners are carrier of a pathogenic or likely pathogenic variant within the same gene) were more common within populations where endogamy was more likely (e.g., Ashkenazi Jewish). When moving from Tier 2 ( $\geq 1/100$  carrier frequency) to Tier 3 ( $1/200$  carrier frequency) or from point X to Y (**Figure S1**), there were an additional 9/10,000 at-risk couples identified. At a carrier frequency of  $1/100$  there were 241 per 10,000 at-risk AJ couples identified and this increased to 250/10,000 at  $1/200$  carrier frequency. This represents a 4% increase in at-risk couples. Additional at-risk couples identified in this interval ranged from 4-9 per 10,000 depending in the endogamous population examined. When the population evaluated was weighted by US census data, at-risk couples identified increased by six per 10,000 couples (45 to 51 per 10,000) when moving from the Tier 2 ( $\geq 1/100$ ) carrier frequency to that of Tier 3 ( $\geq 1/200$ ). Assuming  $\sim 4$  million births per year, this translates to an annual increase of 2,400

additional US couples that will have the opportunity to make reproductive decisions following a positive carrier screening result if Tier 3 autosomal recessive conditions are screened rather than Tier 2.

Importantly, for carrier frequency of less than 1/200 the added number of at-risk couples gets diminishingly small (Z-Y in **Figure S1**). In populations where endogamy is common, modeling<sup>2</sup> suggested that screening for conditions with a carrier frequency of 1/1000 would identify only two additional couples per 10,000 couples screened (0.02%) or 252 vs. 250 couples per 10,000). The range of additional at-risk couples identified across the six populations evaluated was 2-5 per 10,000.<sup>2</sup>

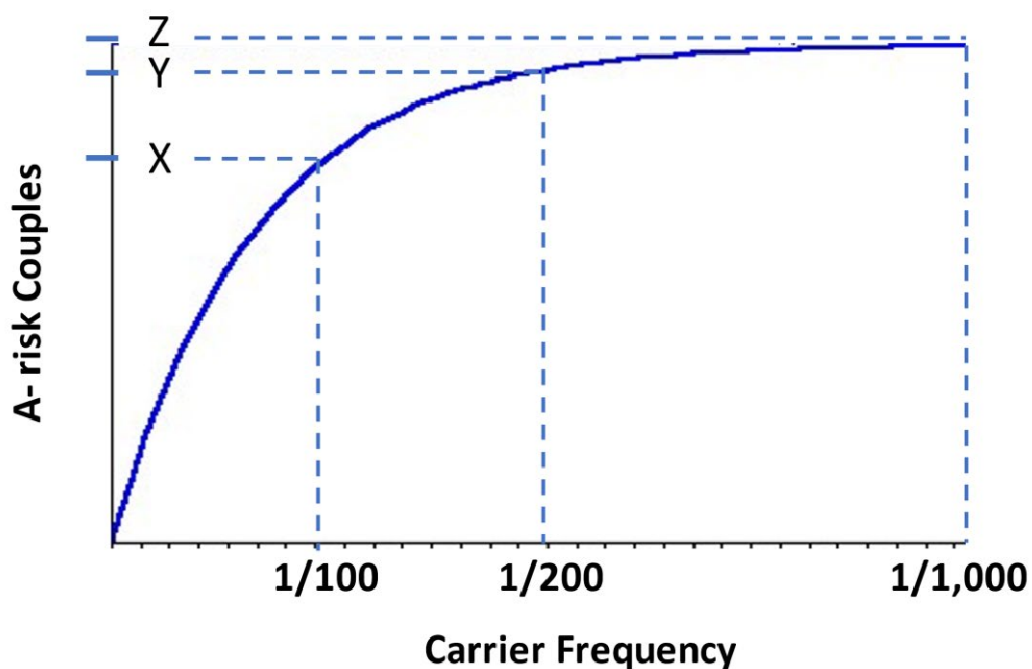

**Figure S1. The relationship between Carrier Frequency and identification of an At-Risk couple.** The gain in identification of at-risk couples (X-Y) is greatest when moving between conditions with higher frequency (1/100 to 1/200). As we move from higher to lower carrier

frequency (1/200 to 1/1000) the gain in identification of at-risk couples (Y-Z) gets diminishingly small.

### **Rationale for 1/40,000 disease prevalence of X-linked genes included in Tier 3 screening**

It seems logical to apply the risk analysis used for screening autosomal recessive conditions. A 1/200 carrier frequency (Tier 3) results in a 1/160,000 risk of an affected fetus (1/200 carrier frequency threshold x 1/200 carrier frequency threshold x 1/4 risk of an affected fetus = 1/160,000). To reach 1/160,000 for an X-linked condition, the carrier frequency of 1/40,000 is required (1/40,000 X-linked condition carrier frequency x 1/2 chance of inheriting the variant X chromosome x 1/2 chance of inheriting Y = 1/160,000). However, this approach relies on accurate carrier frequency data for the X-linked conditions considered and this is precisely what confounds this approach. Currently there is no gnomAD peer-reviewed study with a comprehensive assessment of variant frequencies in X-linked genes across populations.

Among X-linked genes, variants are often *de novo* and may be high as 25% for some X-linked conditions. In other words, population prevalence for any condition is a function of heritable cases plus *de novo* variants. We chose to include conditions with a disease prevalence of at least 1/40,000 because it approaches the calculated frequency of at-risk couples for autosomal recessive conditions. The conditions we recommend have a prevalence that ranges from 1/3,500 to 1/40,000. With nearly 4 million births each year in the US, a condition with a prevalence as high as of 1/3,500 is expected to result in more than 500 affected XY patients each year; for conditions with a prevalence of 1/40,000, 50 affected XY patients will be born each year. We anticipate that screening for these X-linked conditions has the potential to impact at least 1,000 US families annually.

## Technology Considerations

This consensus group recognizes that not all sequence variants and structural rearrangements leading to clinical pathology can be detected using high throughput low-cost laboratory methods. It is beyond the scope of this document to consider the laboratory methods required to make accurate determinations that can reliably classify patients as carriers. The ACMG Laboratory Quality Assurance Committee is assessing the genes proposed for carrier screening to identify appropriate laboratory methods that will result in the greatest sensitivity and specificity while preserving the need for high throughput and low cost.

We also recognize that it will be necessary to reevaluate the genes proposed for screening in this document as there is a continuous growth in accumulation, assessment, and interpretation of the data in human genetic variation. Databases cataloging human sequence accrue new samples leading to a more diverse and representative population composition. Advances in sequencing technology and bioinformatics enlarge the scope of assessed genetic material and improve the number and the type of variants identified. The ClinVar database grows with new submissions and the refinement of variant interpretation is an ongoing process. New genetic etiologies in human disease are being discovered. To address this dynamic nature of available information, a working group of the ACMG Board of Directors is proposed to provide continuing curation of the genes recommended for screening. As ClinGen curates more genes we may find other examples where curation identifies limited gene-disease association as we did for *BCS1L*. Most importantly, new information will be garnered as laboratories use this list of genes for screening across the United States. Using a standardized list of genes that considers many ancestral groups and is built around a transparent process for including and excluding genes will improve our attention to distributive justice. We believe this process recognizes and begins to

address the disparities of genetics and genomics in delivering better health to diverse populations.

**Table S1. Autosomal recessive conditions recommended for screening and scored as definitive in ClinGen, listed as a reportable secondary finding, included in newborn screening programs.**

| <b>Carrier Frequency</b><br>(Table 1-5) see text | $\geq 1/50$<br>N=19                                                                                                               | $< 1/50$ to $\geq 1/100$<br>N=19                            | $< 1/100$ to $\geq 1/150$<br>N=25          | $< 1/150$ to $\geq 1/200$<br>N=23                                             | $\geq 1/200$ del/dup or<br>$\geq 1/200$ US Sub-<br>Population (see text)<br>N=11 |
|--------------------------------------------------|-----------------------------------------------------------------------------------------------------------------------------------|-------------------------------------------------------------|--------------------------------------------|-------------------------------------------------------------------------------|----------------------------------------------------------------------------------|
| <b>ClinGen*</b>                                  | Definitive = 13 genes<br>(68%)                                                                                                    | Definitive = 5 genes<br>(26%)                               | Definitive = 8 genes<br>(32%)              | Definitive = 9 genes<br>(39%)                                                 | Definitive = 4 genes<br>(36%)                                                    |
| <b>ACMG SF V3.0</b>                              | <i>ATP7B</i>                                                                                                                      | <i>GAA</i>                                                  |                                            | <i>BTBD</i>                                                                   |                                                                                  |
| <b>Newborn Screening</b>                         | <b>N=7 phenotypes</b><br><i>HBB, CYP21A2,</i><br><i>PAH, CFTR, GJB2</i><br><i>(deafness), ACADM,</i><br><i>SLC26A4 (deafness)</i> | <b>N=3 phenotypes</b><br><i>GAA, BCKDHB,</i><br><i>MMUT</i> | <b>N=2 phenotypes</b><br><i>GALT, FAH,</i> | <b>N=6 phenotypes</b><br><i>ACADVL, ASL, BTBD,</i><br><i>MCCC2 CBS, IDUA,</i> |                                                                                  |

ACMG, American College of Medical Genetics and Genomics; SF, secondary findings



\*sum does not equal N for each carrier frequency because some genes have been curated in ClinGen but there is no statement regarding gene-disease association. One gene demonstrated limited association and was removed from the Tier 3 panel of genes and one gene was not identified in ClinGen.

**Table S2: X-linked conditions listed in OMIM (November 30, 2020) and initially considered for screening**

| OMIM Search - 'prefix:# AND chromosome:X'<br>Downloaded: Nov 30, 2020<br>Copyright (c) 1966-2020 Johns Hopkins University OMIM, data are provided for research purposes only. |                                                                      |                                                                                  |                                                                                    |
|-------------------------------------------------------------------------------------------------------------------------------------------------------------------------------|----------------------------------------------------------------------|----------------------------------------------------------------------------------|------------------------------------------------------------------------------------|
| MIM Number                                                                                                                                                                    | Title <sup>a</sup>                                                   | Included Titles                                                                  | Cytogenetic Location                                                               |
| #127300                                                                                                                                                                       | LERI-WEILL DYSCHONDROSTEOSIS; LWD                                    | MADELUNG DEFORMITY, INCLUDED                                                     | Xp22.33, Yp11.2                                                                    |
| #300009                                                                                                                                                                       | DENT DISEASE 1                                                       |                                                                                  | Xp11.23                                                                            |
| #300018                                                                                                                                                                       | 46,XY SEX REVERSAL 2; SRXY2                                          |                                                                                  | Xp21.2                                                                             |
| #300029                                                                                                                                                                       | RETINITIS PIGMENTOSA 3; RP3                                          |                                                                                  | Xp11.4                                                                             |
| #300048                                                                                                                                                                       | INTESTINAL PSEUDOObSTRUCTION, NEURONAL, CHRONIC IDIOPATHIC, X-LINKED | CONGENITAL SHORT BOWEL SYNDROME, X-LINKED, INCLUDED - FLNA                       | Xq28                                                                               |
| #300049                                                                                                                                                                       | PERIVENTRICULAR NODULAR HETEROTOPIA 1; PVNH1                         | HETEROTOPIA, PERIVENTRICULAR NODULAR, WITH FRONTOMETAPHYSEAL DYSPLASIA, INCLUDED | Xq28                                                                               |
| #300055                                                                                                                                                                       | MENTAL RETARDATION, X-LINKED, SYNDROMIC 13; MRXS13                   |                                                                                  | Xq28                                                                               |
| #300066                                                                                                                                                                       | DEAFNESS, X-LINKED 4; DFNX4                                          |                                                                                  | Xp22.12                                                                            |
| #300067                                                                                                                                                                       | LISSENCEPHALY, X-LINKED, 1; LISX1                                    | SUBCORTICAL LAMINAR HETEROTOPIA, X-LINKED, INCLUDED; SCLH, INCLUDED              | Xq23                                                                               |
| #300068                                                                                                                                                                       | ANDROGEN INSENSITIVITY SYNDROME; AIS                                 |                                                                                  | Xq12                                                                               |
| #300071                                                                                                                                                                       | NIGHT BLINDNESS, CONGENITAL STATIONARY, TYPE 2A; CSNB2A              |                                                                                  | Xp11.23                                                                            |
| #300087                                                                                                                                                                       | X INACTIVATION, FAMILIAL SKEWED, 1; SXI1                             |                                                                                  | Xq13.2                                                                             |
| #300088                                                                                                                                                                       | DEVELOPMENTAL AND EPILEPTIC ENCEPHALOPATHY 9; DEE9 - PCDH19 gene     |                                                                                  | Xq22.1                                                                             |
| #168600                                                                                                                                                                       | PARKINSON DISEASE, LATE-ONSET; PD                                    |                                                                                  | 1q22, 4q23, 6q27, 12q24.12, 13q21.33, 17q21.31, Xq24                               |
| #176807                                                                                                                                                                       | PROSTATE CANCER                                                      |                                                                                  | 7p22.3, 10p15.2, 10q23.31, 10q25.2, 13q13.1, 16q22.1, 16q22.2-q22.3, 22q12.1, Xq12 |
| #194070                                                                                                                                                                       | WILMS TUMOR 1; WT1                                                   |                                                                                  | 11p13, 13q13.1,                                                                    |

|         |                                                                                                                 |                                                                                                              |                     |
|---------|-----------------------------------------------------------------------------------------------------------------|--------------------------------------------------------------------------------------------------------------|---------------------|
|         |                                                                                                                 |                                                                                                              | Xq26.2<br>(somatic) |
| #300100 | ADRENOLEUKODYSTROPHY; ALD                                                                                       | ADRENOMYELONEUROPATHY,<br>INCLUDED; AMN, INCLUDED                                                            | Xq28                |
| #300106 | SPONDYLOEPIMETAPHYSEAL<br>DYSPLASIA, X-LINKED; SEMDX -<br>BGN gene                                              |                                                                                                              | Xq28                |
| #300114 | RAYNAUD-CLAES SYNDROME;<br>MRXSRC                                                                               |                                                                                                              | Xp22.2              |
| #300123 | MENTAL RETARDATION, X-LINKED,<br>WITH PANHYPOPITUITARISM                                                        | MENTAL RETARDATION, X-<br>LINKED, WITH ISOLATED<br>GROWTH HORMONE<br>DEFICIENCY, INCLUDED;<br>MRGH, INCLUDED | Xq27.1              |
| #300143 | MENTAL RETARDATION, X-LINKED<br>21; MRX21 - IL1RAPL1 gene                                                       |                                                                                                              | Xp21.3-p21.2        |
| #300148 | MEHMO SYNDROME; MEHMO -<br>EIF2S3 gene                                                                          |                                                                                                              | Xp22.11             |
| #300166 | MICROPTHALMIA, SYNDROMIC 2;<br>MCOPS2                                                                           |                                                                                                              | Xp11.4              |
| #300194 | AMME COMPLEX                                                                                                    |                                                                                                              | Xq22.3              |
| #300200 | ADRENAL HYPOPLASIA,<br>CONGENITAL; AHC - NR0B1                                                                  |                                                                                                              | Xp21.2              |
| #300209 | SIMPSON-GOLABI-BEHMEL<br>SYNDROME, TYPE 2; SGBS2                                                                |                                                                                                              | Xp22.2              |
| #300210 | MENTAL RETARDATION, X-LINKED<br>58; MRX58 TSPAN7 gene                                                           |                                                                                                              | Xp11.4              |
| #300215 | LISSENCEPHALY, X-LINKED, 2; LISX2                                                                               | HYDRANENCEPHALY AND<br>ABNORMAL GENITALIA,<br>INCLUDED - - ARX gene                                          | Xp21.3              |
| #300219 | MYOTUBULAR MYOPATHY WITH<br>ABNORMAL GENITAL<br>DEVELOPMENT - - likely MTM1 contig<br>gene deletion             |                                                                                                              |                     |
| #300232 | SPONDYLOEPIMETAPHYSEAL<br>DYSPLASIA, X-LINKED, WITH<br>HYPOMYELINATING<br>LEUKODYSTROPHY; SEMDHL; AIFM1<br>gene |                                                                                                              | Xq26.1              |
| #300238 | MENTAL RETARDATION, X-LINKED,<br>SYNDROMIC 11; MRXS11                                                           |                                                                                                              | Xq26.3              |
| #300243 | MENTAL RETARDATION, X-LINKED,<br>SYNDROMIC, CHRISTIANSON TYPE;<br>MRXSCH; SLC9A6 gene                           |                                                                                                              | Xq26.3              |
| #300244 | TERMINAL OSSEOUS DYSPLASIA;<br>TOD                                                                              |                                                                                                              | Xq28                |
| #300257 | DANON DISEASE                                                                                                   |                                                                                                              | Xq24                |
| #300260 | LUBS X-LINKED MENTAL<br>RETARDATION SYNDROME; MRXSL                                                             |                                                                                                              | Xq28                |
| #300261 | INTELLECTUAL DEVELOPMENTAL<br>DISORDER, X-LINKED, SYNDROMIC,<br>ARMFIELD TYPE; MRXSA                            |                                                                                                              | Xq28                |
| #300263 | SIDERIUS X-LINKED MENTAL<br>RETARDATION SYNDROME; MRXSSD                                                        |                                                                                                              | Xp11.22             |

|         |                                                                                                   |                                                                                           |              |
|---------|---------------------------------------------------------------------------------------------------|-------------------------------------------------------------------------------------------|--------------|
| #300271 | MENTAL RETARDATION, X-LINKED 72; MRX72; RAB39B gene                                               |                                                                                           | Xq28         |
| #300280 | URUGUAY FACIOCARDIOMUSCULOSKELETAL SYNDROME; FCMSU; FHL1 gene                                     |                                                                                           | Xq26.3       |
| #300291 | ECTODERMAL DYSPLASIA AND IMMUNODEFICIENCY 1; EDAID1                                               |                                                                                           | Xq28         |
| #300299 | NEUTROPENIA, SEVERE CONGENITAL, X-LINKED; SCNX; allelic with Wiskott Aldrich                      |                                                                                           | Xp11.23      |
| #300310 | IMMUNODEFICIENCY 61; IMD61; SH3KBP1 gene; 2 brothers reported                                     |                                                                                           | Xp22.12      |
| #300321 | FG SYNDROME 2; FGS2; FLNA gene                                                                    |                                                                                           | Xq28         |
| #300322 | LESCH-NYHAN SYNDROME; LNS                                                                         | HPRT DEFICIENCY, NEUROLOGIC VARIANT, INCLUDED                                             | Xq26.2-q26.3 |
| #300323 | HYPERURICEMIA, HPRT-RELATED; HRH                                                                  |                                                                                           | Xq26.2-q26.3 |
| #300337 | HYPOMELANOSIS OF ITO; HMI; Incontinentia pigmenti Type 1 (not classic type); mosaic translocation |                                                                                           |              |
| #300352 | CEREBRAL CREATINE DEFICIENCY SYNDROME 1; CCDS1                                                    |                                                                                           | Xq28         |
| #300354 | MENTAL RETARDATION, X-LINKED, SYNDROMIC, CABEZAS TYPE; MRXSC                                      |                                                                                           | Xq24         |
| #300367 | THROMBOCYTOPENIA, X-LINKED, WITH OR WITHOUT DYSERYTHROPOIETIC ANEMIA; XLTDA; GATA1 gene           |                                                                                           | Xp11.23      |
| #300373 | OSTEOPATHIA STRIATA WITH CRANIAL SCLEROSIS; OSCS; WTX aka AMER1 gene                              |                                                                                           | Xq11.2       |
| #300376 | MUSCULAR DYSTROPHY, BECKER TYPE; BMD                                                              |                                                                                           | Xp21.2-p21.1 |
| #300387 | MENTAL RETARDATION, X-LINKED 63; MRX63; ACSL4 gene                                                |                                                                                           | Xq23         |
| #300400 | SEVERE COMBINED IMMUNODEFICIENCY, X-LINKED; SCIDX1                                                |                                                                                           | Xq13.1       |
| #300419 | MENTAL RETARDATION, X-LINKED, WITH OR WITHOUT SEIZURES, ARX-RELATED; MRXARX                       |                                                                                           | Xp21.3       |
| #300422 | FG SYNDROME 4; FGS4                                                                               | MENTAL RETARDATION, X-LINKED, WITH OR WITHOUT NYSTAGMUS, INCLUDED; FG4 in OMIM; CASK gene | Xp11.4       |
| #300423 | MENTAL RETARDATION, X-LINKED, SYNDROMIC, HEDERA TYPE; MRXSH; ATP6AP2 gene                         |                                                                                           | Xp11.4       |
| #300424 | RETINITIS PIGMENTOSA 23; RP23; OFD1 gene                                                          |                                                                                           | Xp22.2       |
| #300425 | AUTISM, SUSCEPTIBILITY TO, X-LINKED 1; AUTSX1; NLGN3 gene                                         |                                                                                           | Xq13.1       |

|         |                                                                                            |                                                                        |                |
|---------|--------------------------------------------------------------------------------------------|------------------------------------------------------------------------|----------------|
| #300434 | STOCCO DOS SANTOS X-LINKED MENTAL RETARDATION SYNDROME; SDSX; SHROOM4 gene                 |                                                                        | Xp11.22        |
| #300438 | HSD10 MITOCHONDRIAL DISEASE; HSD10MD                                                       |                                                                        | Xp11.22        |
| #300448 | ALPHA-THALASSEMIA MYELODYSPLASIA SYNDROME; ATMDS                                           |                                                                        | Xq21.1         |
| #300455 | RETINITIS PIGMENTOSA, X-LINKED, AND SINORESPIRATORY INFECTIONS, WITH OR WITHOUT DEAFNESS   |                                                                        | Xp11.4         |
| #300472 | CORPUS CALLOSUM, AGENESIS OF, WITH MENTAL RETARDATION, OCULAR COLOBOMA, AND MICROGNATHIA   |                                                                        | Xq13.1         |
| #300475 | DEAFNESS, DYSTONIA, AND CEREBRAL HYPOMYELINATION; DDCH                                     | CONTIGUOUS ABCD1/DXS1375E DELETION SYNDROME, INCLUDED; CADD5, INCLUDED | Xq28           |
| #300476 | CONE-ROD DYSTROPHY, X-LINKED, 3; CORDX3                                                    |                                                                        | Xp11.23        |
| #300486 | MENTAL RETARDATION, X-LINKED, WITH CEREBELLAR HYPOPLASIA AND DISTINCTIVE FACIAL APPEARANCE |                                                                        | Xq12           |
| #300489 | SPINAL MUSCULAR ATROPHY, DISTAL, X-LINKED 3; SMAX3                                         |                                                                        | Xq21.1         |
| #300491 | EPILEPSY, X-LINKED, WITH VARIABLE LEARNING DISABILITIES AND BEHAVIOR DISORDERS             |                                                                        | Xp11.3-p11.2   |
| #300494 | ASPERGER SYNDROME, X-LINKED, SUSCEPTIBILITY TO, 1; ASPGX1                                  |                                                                        | Xq13.1         |
| #300495 | AUTISM, SUSCEPTIBILITY TO, X-LINKED 2; AUTSX2                                              | MENTAL RETARDATION, X-LINKED, INCLUDED                                 | Xp22.32-p22.31 |
| #300496 | AUTISM, SUSCEPTIBILITY TO, X-LINKED 3; AUTSX3                                              |                                                                        | Xq28           |
| #300497 | ASPERGER SYNDROME, X-LINKED, SUSCEPTIBILITY TO, 2; ASPGX2                                  |                                                                        | Xp22.32-p22.31 |
| #300500 | ALBINISM, OCULAR, TYPE I; OA1                                                              |                                                                        | Xp22.2         |
| #300510 | OVARIAN DYSGENESIS 2; ODG2                                                                 | PREMATURE OVARIAN FAILURE 4, INCLUDED; POF4, INCLUDED                  | Xp11.22        |
| #300511 | PREMATURE OVARIAN FAILURE 2A; POF2A                                                        |                                                                        | Xq21.33        |
| #300514 | FANCONI ANEMIA, COMPLEMENTATION GROUP B; FANCB                                             |                                                                        | Xp22.2         |
| #300523 | ALLAN-HERNDON-DUDLEY SYNDROME; AHDS                                                        |                                                                        | Xq13.2         |
| #300534 | MENTAL RETARDATION, X-LINKED, SYNDROMIC, CLAES-JENSEN TYPE; MRXSCJ                         |                                                                        | Xp11.22        |

|         |                                                                              |                                                  |                 |
|---------|------------------------------------------------------------------------------|--------------------------------------------------|-----------------|
| #300539 | NEPHROGENIC SYNDROME OF INAPPROPRIATE ANTIDIURESIS; NSIAD                    |                                                  | Xq28            |
| #300554 | HYPOPHOSPHATEMIC RICKETS, X-LINKED RECESSIVE                                 |                                                  | Xp11.23         |
| #300555 | DENT DISEASE 2                                                               |                                                  | Xq26.1          |
| #300558 | MENTAL RETARDATION, X-LINKED 30; MRX30                                       |                                                  | Xq23            |
| #300559 | GLYCOGEN STORAGE DISEASE, TYPE IXd; GSD9D                                    |                                                  | Xq13.1          |
| #300578 | CHROMOSOME Xp11.3 DELETION SYNDROME                                          |                                                  | Xp11.3          |
| #300582 | SHORT STATURE, IDIOPATHIC, X-LINKED; ISS                                     |                                                  | Xp22.33, Yp11.2 |
| #300590 | CORNELIA DE LANGE SYNDROME 2; CDLS2                                          |                                                  | Xp11.22         |
| #300600 | ALAND ISLAND EYE DISEASE; AIED                                               |                                                  | Xp11.23         |
| #300604 | PREMATURE OVARIAN FAILURE 2B; POF2B                                          |                                                  | Xq21.1          |
| #300607 | DEVELOPMENTAL AND EPILEPTIC ENCEPHALOPATHY 8; DEE8                           |                                                  | Xq11.1          |
| #300614 | DEAFNESS, X-LINKED 5, WITH PERIPHERAL NEUROPATHY; DFNX5                      |                                                  | Xq26.1          |
| #300615 | BRUNNER SYNDROME; BRNRS                                                      | ANTISOCIAL BEHAVIOR, SUSCEPTIBILITY TO, INCLUDED | Xp11.3          |
| #300622 | TN POLYAGGLUTINATION SYNDROME; TNPS                                          |                                                  | Xq24            |
| #300623 | FRAGILE X TREMOR/ATAXIA SYNDROME; FXTAS                                      |                                                  | Xq27.3          |
| #300624 | FRAGILE X SYNDROME; FXS                                                      |                                                  | Xq27.3          |
| #300633 | HYPOSPADIAS 1, X-LINKED; HYSP1                                               |                                                  | Xq12            |
| #300635 | LYMPHOPROLIFERATIVE SYNDROME, X-LINKED, 2; XLP2                              |                                                  | Xq25            |
| #300636 | IMMUNODEFICIENCY 33; IMD33                                                   |                                                  | Xq28            |
| #300643 | ROLANDIC EPILEPSY, MENTAL RETARDATION, AND SPEECH DYSPRAXIA, X-LINKED; RESDX |                                                  | Xq22.1          |
| #300645 | IMMUNODEFICIENCY 34; IMD34                                                   |                                                  | Xp21.1-p11.4    |
| #300653 | PHOSPHOGLYCERATE KINASE 1 DEFICIENCY                                         |                                                  | Xq21.1          |
| #300659 | MENTAL RETARDATION, X-LINKED 93; MRX93                                       |                                                  | Xq21.1          |
| #300661 | PHOSPHORIBOSYLPYROPHOSPHATE SYNTHETASE SUPERACTIVITY                         | GOUT, PRPS-RELATED, INCLUDED                     | Xq22.3          |
| #300672 | DEVELOPMENTAL AND EPILEPTIC ENCEPHALOPATHY 2; DEE2                           |                                                  | Xp22.13         |
| #300673 | ENCEPHALOPATHY, NEONATAL SEVERE, DUE TO MECP2 MUTATIONS                      |                                                  | Xq28            |
| #300676 | MENTAL RETARDATION, X-LINKED, SYNDROMIC 14; MRXS14                           |                                                  | Xq24            |
| #300679 | CHROMOSOME Xp21 DELETION SYNDROME                                            |                                                  | Xp21            |
| #300695 | SCAPULOPERONEAL MYOPATHY, X-LINKED DOMINANT; SPM                             |                                                  | Xq26.3          |

|         |                                                                                              |                                                                          |                |
|---------|----------------------------------------------------------------------------------------------|--------------------------------------------------------------------------|----------------|
| #300696 | MYOPATHY, X-LINKED, WITH POSTURAL MUSCLE ATROPHY; XMPMA                                      | EMERY-DREIFUSS MUSCULAR DYSTROPHY 6, X-LINKED, INCLUDED; EDMD6, INCLUDED | Xq26.3         |
| #300699 | INTELLECTUAL DEVELOPMENTAL DISORDER, X-LINKED, SYNDROMIC, WU TYPE; MRXSW                     |                                                                          | Xq25           |
| #300705 | CHROMOSOME Xp11.22 DUPLICATION SYNDROME                                                      |                                                                          | Xp11.22        |
| #300707 | TOE SYNDACTYLY, TELECANTHUS, AND ANOGENITAL AND RENAL MALFORMATIONS; STAR                    |                                                                          | Xq28           |
| #300717 | REDUCING BODY MYOPATHY, X-LINKED 1A, SEVERE, WITH INFANTILE OR EARLY CHILDHOOD ONSET; RBMX1A |                                                                          | Xq26.3         |
| #300718 | REDUCING BODY MYOPATHY, X-LINKED 1B, WITH LATE CHILDHOOD OR ADULT ONSET; RBMX1B              |                                                                          | Xq26.3         |
| #300749 | MENTAL RETARDATION AND MICROCEPHALY WITH PONTINE AND CEREBELLAR HYPOPLASIA; MICPCH           |                                                                          | Xp11.4         |
| #300751 | ANEMIA, SIDEROBLASTIC, 1; SIDBA1                                                             |                                                                          | Xp11.21        |
| #300752 | PROTOPORPHYRIA, ERYTHROPOIETIC, X-LINKED; XLEPP                                              |                                                                          | Xp11.21        |
| #300755 | AGAMMAGLOBULINEMIA, X-LINKED; XLA                                                            | HYPOGAMMAGLOBULINEMIA, X-LINKED, INCLUDED                                | Xq22.1         |
| #300758 | HYOSPADIAS 2, X-LINKED; HYS2                                                                 |                                                                          | Xq28           |
| #300770 | SURFACTANT METABOLISM DYSFUNCTION, PULMONARY, 4; SMDP4                                       |                                                                          | Xp22.33        |
| #300799 | INTELLECTUAL DEVELOPMENTAL DISORDER, X-LINKED, SYNDROMIC, RAYMOND TYPE; MRXSR                |                                                                          | Xq26.1         |
| #300801 | CHROMOSOME Xp11.23-p11.22 DUPLICATION SYNDROME                                               |                                                                          | Xp11.23-p11.22 |
| #300802 | MENTAL RETARDATION, X-LINKED 96; MRX96                                                       |                                                                          | Xp11.23        |
| #300803 | MENTAL RETARDATION, X-LINKED 97; MRX97                                                       |                                                                          | Xq21.1         |
| #300804 | JOUBERT SYNDROME 10; JBTS10                                                                  |                                                                          | Xp22.2         |
| #300807 | THROMBOPHILIA, X-LINKED, DUE TO FACTOR IX DEFECT; THPH8                                      | DEEP VENOUS THROMBOSIS, PROTECTION AGAINST, INCLUDED                     | Xq27.1         |
| #300814 | NYSTAGMUS 6, CONGENITAL, X-LINKED; NYS6                                                      |                                                                          | Xp22.2         |
| #300815 | CHROMOSOME Xq28 DUPLICATION SYNDROME                                                         |                                                                          | Xq28           |
| #300816 | COMBINED OXIDATIVE PHOSPHORYLATION DEFICIENCY 6; COXPD6                                      |                                                                          | Xq26.1         |
| #300818 | PAROXYSMAL NOCTURNAL HEMOGLOBINURIA 1; PNH1                                                  |                                                                          | Xp22.2         |
| #300830 | AUTISM, SUSCEPTIBILITY TO, X-LINKED 4; AUTSX4                                                |                                                                          | Xp22.11        |
| #300831 | CK SYNDROME                                                                                  |                                                                          | Xq28           |

|         |                                                                                                      |                                                                          |            |
|---------|------------------------------------------------------------------------------------------------------|--------------------------------------------------------------------------|------------|
| #300833 | 46,XX SEX REVERSAL 3; SRXX3                                                                          | CHROMOSOME Xq26 DELETION SYNDROME, INCLUDED                              | Xq26.3     |
| #300834 | MACULAR DEGENERATION, X-LINKED ATROPHIC                                                              |                                                                          | Xp11.4     |
| #300835 | ANEMIA, X-LINKED, WITH OR WITHOUT NEUTROPENIA AND/OR PLATELET ABNORMALITIES; XLANP                   |                                                                          | Xp11.23    |
| #300842 | MCLEOD SYNDROME; MCLDS                                                                               | MCLEOD SYNDROME WITH CHRONIC GRANULOMATOUS DISEASE, INCLUDED             | Xp21.1     |
| #300844 | MENTAL RETARDATION, X-LINKED 19; MRX19                                                               |                                                                          | Xp22.12    |
| #300845 | MOYAMOYA DISEASE 4 WITH SHORT STATURE, HYPERGONADOTROPIC HYPOGONADISM, AND FACIAL DYSMORPHISM; MYMY4 |                                                                          | Xq28       |
| #300847 | AUTISM, SUSCEPTIBILITY TO, X-LINKED 5; AUTSX5                                                        |                                                                          | Xq28       |
| #300849 | MENTAL RETARDATION, X-LINKED 41; MRX41                                                               |                                                                          | Xq28       |
| #300850 | MENTAL RETARDATION, X-LINKED 90; MRX90                                                               |                                                                          | Xq13.1     |
| #300853 | IMMUNODEFICIENCY, X-LINKED, WITH MAGNESIUM DEFECT, EPSTEIN-BARR VIRUS INFECTION, AND NEOPLASIA; XMEN |                                                                          | Xq21.1     |
| #300854 | RENAL CELL CARCINOMA, Xp11-ASSOCIATED; RCCX1                                                         |                                                                          | Xp11.23    |
| #300855 | OGDEN SYNDROME; OGDNS                                                                                |                                                                          | Xq28       |
| #300857 | AMYOTROPHIC LATERAL SCLEROSIS 15 WITH OR WITHOUT FRONTOTEMPORAL DEMENTIA; ALS15                      |                                                                          | Xp11.21    |
| #300860 | MENTAL RETARDATION, X-LINKED, SYNDROMIC, NASCIMENTO TYPE; MRXSN                                      |                                                                          | Xq24       |
| #300863 | CHONDRODYSPLASIA WITH PLATYSPONDYLY, DISTINCTIVE BRACHYDACTYLY, HYDROCEPHALY, AND MICROPHthalmIA     |                                                                          | Xp11.23    |
| #300867 | KABUKI SYNDROME 2; KABUK2                                                                            |                                                                          | Xp11.3     |
| #300868 | MULTIPLE CONGENITAL ANOMALIES-HYPOTONIA-SEIZURES SYNDROME 2; MCAHS2                                  |                                                                          | Xp22.2     |
| #300869 | CHROMOSOME Xq27.3-q28 DUPLICATION SYNDROME                                                           |                                                                          | Xq27.3-q28 |
| #300872 | AUTISM, SUSCEPTIBILITY TO, X-LINKED 6; AUTSX6                                                        |                                                                          | Xq28       |
| #300882 | CORNELIA DE LANGE SYNDROME 5; CDLS5                                                                  |                                                                          | Xq13.1     |
| #300884 | DEVELOPMENTAL AND EPILEPTIC ENCEPHALOPATHY 36; DEE36                                                 | CONGENITAL DISORDER OF GLYCOSYLATION, TYPE 1s, INCLUDED; CDG1S, INCLUDED | Xq23       |



|         |                                                                                     |  |         |
|---------|-------------------------------------------------------------------------------------|--|---------|
| #300886 | MENTAL RETARDATION, X-LINKED, SYNDROMIC 32; MRXS32                                  |  | Xq28    |
| #300887 | LINEAR SKIN DEFECTS WITH MULTIPLE CONGENITAL ANOMALIES 2; LSDMCA2                   |  | Xq21.1  |
| #300888 | HYPOTHYROIDISM, CENTRAL, WITH TESTICULAR ENLARGEMENT; CHTE                          |  | Xq26.1  |
| #300894 | NEURODEGENERATION WITH BRAIN IRON ACCUMULATION 5; NBIA5                             |  | Xp11.23 |
| #300895 | OHDO SYNDROME, X-LINKED; OHDOX                                                      |  | Xq13.1  |
| #300896 | CONGENITAL DISORDER OF GLYCOSYLATION, TYPE II <sub>m</sub> ; CDG2M                  |  | Xp11.23 |
| #300905 | CHARCOT-MARIE-TOOTH DISEASE, X-LINKED DOMINANT, 6; CMTX6                            |  | Xp22.11 |
| #300908 | ANEMIA, NONSPHEROCYTIC HEMOLYTIC, DUE TO G6PD DEFICIENCY                            |  | Xq28    |
| #300909 | ANGIOEDEMA INDUCED BY ACE INHIBITORS, SUSCEPTIBILITY TO; AEACEI                     |  | Xq26.1  |
| #300910 | BONE MINERAL DENSITY QUANTITATIVE TRAIT LOCUS 18; BMND18                            |  | Xq23    |
| #300911 | PARKINSONISM WITH SPASTICITY, X-LINKED; XPDS                                        |  | Xp11.4  |
| #300912 | MENTAL RETARDATION, X-LINKED 98; MRX98                                              |  | Xq13.3  |
| #300914 | DEAFNESS, X-LINKED 6; DFNX6                                                         |  | Xq22.3  |
| #300915 | MICROPTHALMIA, SYNDROMIC 13; MCOPS13                                                |  | Xq28    |
| #300918 | PALMOPLANTAR KERATODERMA, MUTILATING, WITH PERIORIFICAL KERATOTIC PLAQUES, X-LINKED |  | Xp22.12 |
| #300919 | MENTAL RETARDATION, X-LINKED 99; MRX99                                              |  | Xp11.4  |
| #300923 | MENTAL RETARDATION, X-LINKED 100; MRX100                                            |  | Xq13.1  |
| #300928 | MENTAL RETARDATION, X-LINKED 101; MRX101                                            |  | Xq22.3  |
| #300932 | THYROXINE-BINDING GLOBULIN QUANTITATIVE TRAIT LOCUS; TBGQTL                         |  | Xq22.3  |
| #300934 | CONGENITAL DISORDER OF GLYCOSYLATION, TYPE I <sub>y</sub> ; CDG1Y                   |  | Xq28    |
| #300942 | CHROMOSOME Xq26.3 DUPLICATION SYNDROME                                              |  | Xq26.3  |
| #300943 | PITUITARY ADENOMA 2, GROWTH HORMONE-SECRETING; PITA2                                |  | Xq26.3  |
| #300946 | DIAMOND-BLACKFAN ANEMIA 14 WITH MANDIBULOFACIAL DYSOSTOSIS; DBA14                   |  | Xp11.22 |
| #300952 | LINEAR SKIN DEFECTS WITH MULTIPLE CONGENITAL ANOMALIES 3; LSDMCA3                   |  | Xp11.3  |

|         |                                                                                            |                                         |         |
|---------|--------------------------------------------------------------------------------------------|-----------------------------------------|---------|
| #300953 | TRICHOTHIODYSTROPHY 5,<br>NONPHOTOSENSITIVE; TTD5                                          |                                         | Xq24    |
| #300957 | MENTAL RETARDATION, X-LINKED<br>12; MRX12                                                  |                                         | Xq25    |
| #300958 | INTELLECTUAL DEVELOPMENTAL<br>DISORDER, X-LINKED, SYNDROMIC,<br>SNIJDERS BLOK TYPE; MRXSSB |                                         | Xp11.4  |
| #300960 | MEND SYNDROME; MEND                                                                        |                                         | Xp11.23 |
| #300963 | RITSCHER-SCHINZEL SYNDROME 2;<br>RTSC2                                                     |                                         | Xp11.23 |
| #300966 | MENTAL RETARDATION, X-LINKED,<br>SYNDROMIC 33; MRXS33                                      |                                         | Xq13.1  |
| #300967 | MENTAL RETARDATION, X-LINKED,<br>SYNDROMIC 34; MRXS34                                      |                                         | Xq13.1  |
| #300968 | MENTAL RETARDATION, X-LINKED<br>99, SYNDROMIC, FEMALE-<br>RESTRICTED; MRXS99F              |                                         | Xp11.4  |
| #300971 | BARTTER SYNDROME, TYPE 5,<br>ANTENATAL, TRANSIENT; BARTS5                                  |                                         | Xp11.21 |
| #300972 | IMMUNODEFICIENCY 47; IMD47                                                                 |                                         | Xq28    |
| #300978 | TONNE-KALSCHUEER SYNDROME;<br>TOKAS                                                        |                                         | Xq13.2  |
| #300979 | Xq25 DUPLICATION SYNDROME                                                                  | Xq25 TRIPLICATION<br>SYNDROME, INCLUDED | Xq25    |
| #300982 | MENTAL RETARDATION, X-LINKED<br>103; MRX103                                                |                                         | Xp22.11 |
| #300983 | MENTAL RETARDATION, X-LINKED<br>104; MRX104                                                |                                         | Xp22.2  |
| #300984 | MENTAL RETARDATION, X-LINKED<br>105; MRX105                                                |                                         | Xp11.23 |
| #300985 | VAS DEFERENS, CONGENITAL<br>BILATERAL APLASIA OF, X-LINKED;<br>CBAVDX                      |                                         | Xp22.13 |
| #300986 | MENTAL RETARDATION, X-LINKED,<br>SYNDROMIC, BAIN TYPE; MRXSB                               |                                         | Xq22.1  |
| #300988 | IMMUNODEFICIENCY 50; IMD50                                                                 |                                         | Xq12    |
| #300989 | MEESTER-LOEYS SYNDROME; MRLS                                                               |                                         | Xq28    |
| #300990 | MIDFACE HYPOPLASIA, HEARING<br>IMPAIRMENT, ELLIPTOCYTOSIS, AND<br>NEPHROCALCINOSIS; MFHIEN |                                         | Xq23    |
| #300991 | CILIARY DYSKINESIA, PRIMARY, 36,<br>X-LINKED; CILD36                                       |                                         | Xq22.3  |
| #300997 | MENTAL RETARDATION, X-LINKED<br>106; MRX106                                                |                                         | Xq13.1  |
| #300998 | MENTAL RETARDATION, X-LINKED,<br>SYNDROMIC, 35; MRXS35                                     |                                         | Xq28    |
| #301000 | WISKOTT-ALDRICH SYNDROME;<br>WAS                                                           |                                         | Xp11.23 |
| #301006 | GALLOWAY-MOWAT SYNDROME 2,<br>X-LINKED; GAMOS2                                             |                                         | Xq28    |
| #301008 | MENTAL RETARDATION, X-LINKED,<br>SYNDROMIC, HOUGE TYPE; MRXSHG                             |                                         | Xp22.12 |
| #301010 | MYOPIA 26, X-LINKED,<br>FEMALE-RESTRICTED; MYP26                                           |                                         | Xq13.1  |

|         |                                                                                              |  |              |
|---------|----------------------------------------------------------------------------------------------|--|--------------|
| #301013 | MENTAL RETARDATION, X-LINKED 107; MRX107                                                     |  | Xq24         |
| #301014 | OSTEOGENESIS IMPERFECTA, TYPE XIX; OI19                                                      |  | Xp22.12      |
| #301015 | HEMOLYTIC ANEMIA, CONGENITAL, X-LINKED                                                       |  | Xq27.1       |
| #301018 | DEAFNESS, X-LINKED 7; DFNX7                                                                  |  | Xq22.1       |
| #301020 | MITOCHONDRIAL COMPLEX I DEFICIENCY, NUCLEAR TYPE 12; MC1DN12                                 |  | Xq24         |
| #301021 | MITOCHONDRIAL COMPLEX I DEFICIENCY, NUCLEAR TYPE 30; MC1DN30                                 |  | Xp11.3       |
| #301022 | MULLEGAMA-KLEIN-MARTINEZ SYNDROME; MKMS                                                      |  | Xq25         |
| #301024 | INTELLECTUAL DEVELOPMENTAL DISORDER, X-LINKED 108; MRX108                                    |  | Xp11.3       |
| #301025 | PAGANINI-MIOZZO SYNDROME; MRXSPM                                                             |  | Xq26.2       |
| #301026 | KEIPERT SYNDROME; KPTS                                                                       |  | Xq26.2       |
| #301028 | NEPHROTIC SYNDROME, TYPE 20; NPHS20                                                          |  | Xq22.3       |
| #301029 | SHUKLA-VERNON SYNDROME; SHUVER                                                               |  | Xq26.1       |
| #301030 | VAN ESCH-O'DRISCOLL SYNDROME; VEODS                                                          |  | Xp22.1-p21.3 |
| #301031 | CONGENITAL DISORDER OF GLYCOSYLATION, TYPE Icc; CDG1CC                                       |  | Xq21.1       |
| #301032 | BASILICATA-AKHTAR SYNDROME; MRXSBA                                                           |  | Xp22.2       |
| #301033 | HYPOTHYROIDISM, CONGENITAL, NONGOITROUS, 8; CHNG8                                            |  | Xp22.3-p22.2 |
| #301035 | HYPOTHYROIDISM, CONGENITAL, NONGOITROUS, 9; CHNG9                                            |  | Xq22.3       |
| #301039 | INTELLECTUAL DEVELOPMENTAL DISORDER, X-LINKED, SYNDROMIC, HACKMANN-DI DONATO TYPE; MRXSHD    |  | Xq24         |
| #301040 | ALPHA-THALASSEMIA/MENTAL RETARDATION SYNDROME, X-LINKED; ATRX                                |  | Xq21.1       |
| #301041 | WIEACKER-WOLFF SYNDROME, FEMALE-RESTRICTED; WRWFFR                                           |  | Xq11.2       |
| #301043 | HOLOPROSENCEPHALY 13, X-LINKED; HPE13                                                        |  | Xq25         |
| #301044 | EPILEPTIC ENCEPHALOPATHY, EARLY INFANTILE, 85, WITH OR WITHOUT MIDLINE BRAIN DEFECTS; EIEE85 |  | Xp11.22      |
| #301045 | CONGENITAL DISORDER OF GLYCOSYLATION, TYPE IIr; CDG2R                                        |  | Xp11.4       |
| #301050 | ALPORT SYNDROME 1, X-LINKED; ATS1                                                            |  | Xq22.3       |
| #301051 | IMMUNODEFICIENCY 74, COVID19-RELATED, X-LINKED; IMD74                                        |  | Xp22.2       |

|         |                                                                              |                                                      |              |
|---------|------------------------------------------------------------------------------|------------------------------------------------------|--------------|
| #301052 | WARFARIN SENSITIVITY, X-LINKED                                               |                                                      | Xq27.1       |
| #301054 | VEXAS SYNDROME; VEXAS                                                        |                                                      | Xp11.3       |
| #301200 | AMELOGENESIS IMPERFECTA, TYPE IE; AIIE                                       |                                                      | Xp22.2       |
| #301220 | PIGMENTARY DISORDER, RETICULATE, WITH SYSTEMIC MANIFESTATIONS, X-LINKED; PDR |                                                      | Xp22.1-p21.3 |
| #301310 | ANEMIA, SIDEROBLASTIC, AND SPINOCEREBELLAR ATAXIA; ASAT                      |                                                      | Xq13.3       |
| #301500 | FABRY DISEASE                                                                | FABRY DISEASE, CARDIAC VARIANT, INCLUDED             | Xq22.1       |
| #301830 | SPINAL MUSCULAR ATROPHY, X-LINKED 2; SMAX2                                   |                                                      | Xp11.3       |
| #301835 | ARTS SYNDROME; ARTS                                                          |                                                      | Xq22.3       |
| #301900 | BORJESON-FORSSMAN-LEHMANN SYNDROME; BFLS                                     |                                                      | Xq26.2       |
| #302045 | CARDIOMYOPATHY, DILATED, 3B; CMD3B                                           |                                                      | Xp21.2-p21.1 |
| #302060 | BARTH SYNDROME; BTHS                                                         |                                                      | Xq28         |
| #302200 | CATARACT 40; CTRCT40                                                         |                                                      | Xp22.2-p22.1 |
| #302350 | NANCE-HORAN SYNDROME; NHS                                                    |                                                      | Xp22.2-p22.1 |
| #302500 | SPINOCEREBELLAR ATAXIA, X-LINKED 1; SCAX1                                    |                                                      | Xq28         |
| #302800 | CHARCOT-MARIE-TOOTH DISEASE, X-LINKED DOMINANT, 1; CMTX1                     |                                                      | Xq13.1       |
| #302802 | CHARCOT-MARIE-TOOTH DISEASE, X-LINKED RECESSIVE, 3; CMTX3                    |                                                      | Xq26         |
| #302905 | ABRUZZO-ERICKSON SYNDROME; ABERS                                             |                                                      | Xq21.1       |
| #302950 | CHONDRODYSPLASIA PUNCTATA 1, X-LINKED RECESSIVE; CDPX1                       |                                                      | Xp22.33      |
| #302960 | CHONDRODYSPLASIA PUNCTATA 2, X-LINKED DOMINANT; CDPX2                        |                                                      | Xp11.23      |
| #303100 | CHOROIDEREMIA; CHM                                                           | CHOROIDAL SCLEROSIS, INCLUDED                        | Xq21.2       |
| #303110 | CHOROIDEREMIA, DEAFNESS, AND MENTAL RETARDATION                              |                                                      | Xq21         |
| #303350 | MASA SYNDROME                                                                |                                                      | Xq28         |
| #303400 | CLEFT PALATE WITH OR WITHOUT ANKYLOGLOSSIA, X-LINKED; CPX                    |                                                      | Xq21.1       |
| #303600 | COFFIN-LOWRY SYNDROME; CLS                                                   |                                                      | Xp22.12      |
| #303700 | BLUE CONE MONOCHROMACY; BCM                                                  | CONE DYSTROPHY 5, X-LINKED, INCLUDED; COD5, INCLUDED | Xq28, Xq28   |
| #303800 | COLORBLINDNESS, PARTIAL, DEUTAN SERIES; CBD                                  | DEUTERANOMALY, INCLUDED                              | Xq28         |
| #303900 | COLORBLINDNESS, PARTIAL, PROTAN SERIES; CBP                                  | PROTANOMALY, INCLUDED                                | Xq28         |
| #304020 | CONE-ROD DYSTROPHY, X-LINKED, 1; CORDX1                                      | CONE DYSTROPHY 1, X-LINKED, INCLUDED; COD1, INCLUDED | Xp11.4       |
| #304100 | CORPUS CALLOSUM, PARTIAL AGENESIS OF, X-LINKED                               |                                                      | Xq28         |
| #304110 | CRANIOFRONTONASAL SYNDROME; CFNS                                             |                                                      | Xq13.1       |

|         |                                                                              |                                                                                            |              |
|---------|------------------------------------------------------------------------------|--------------------------------------------------------------------------------------------|--------------|
| #304120 | OTOPALATODIGITAL SYNDROME, TYPE II; OPD2                                     |                                                                                            | Xq28         |
| #304150 | OCCIPITAL HORN SYNDROME; OHS                                                 |                                                                                            | Xq21.1       |
| #304340 | PETTIGREW SYNDROME; PGS                                                      |                                                                                            | Xp22.2       |
| #304400 | DEAFNESS, X-LINKED 2; DFNX2                                                  |                                                                                            | Xq21.1       |
| #304500 | DEAFNESS, X-LINKED 1; DFNX1                                                  |                                                                                            | Xq22.3       |
| #304700 | MOHR-TRANEBJAERG SYNDROME; MTS                                               |                                                                                            | Xq22.1       |
| #304790 | IMMUNODYSREGULATION, POLYENDOCRINOPATHY, AND ENTEROPATHY, X-LINKED; IPEX     | ISLETS OF LANGERHANS, ABSENCE OF, INCLUDED                                                 | Xp11.23      |
| #304800 | DIABETES INSIPIDUS, NEPHROGENIC, X-LINKED                                    |                                                                                            | Xq28         |
| #305000 | DYSKERATOSIS CONGENITA, X-LINKED; DKCX                                       | HOYERAAL-HREIDARSSON SYNDROME, INCLUDED; HHS, INCLUDED                                     | Xq28         |
| #305100 | ECTODERMAL DYSPLASIA 1, HYPOHIDROTIC, X-LINKED; XHED                         |                                                                                            | Xq13.1       |
| #305390 | EXUDATIVE VITREORETINOPATHY 2, X-LINKED; EVR2                                |                                                                                            | Xp11.3       |
| #305400 | AARSKOG-SCOTT SYNDROME; AAS                                                  | FACIOGENITAL DYSPLASIA WITH ATTENTION DEFICIT-HYPERACTIVITY DISORDER, INCLUDED             | Xp11.22      |
| #305450 | OPITZ-KAVEGGIA SYNDROME; OKS                                                 |                                                                                            | Xq13.1       |
| #305600 | FOCAL DERMAL HYPOPLASIA; FDH                                                 |                                                                                            | Xp11.23      |
| #305620 | FRONTOMETAPHYSEAL DYSPLASIA 1; FMD1                                          |                                                                                            | Xq28         |
| #306000 | GLYCOGEN STORAGE DISEASE IXa1; GSD9A1                                        | GLYCOGEN STORAGE DISEASE IXa2, INCLUDED; GSD9A2, INCLUDED                                  | Xp22.13      |
| #306400 | GRANULOMATOUS DISEASE, CHRONIC, X-LINKED; CGDX                               | CYTOCHROME b-POSITIVE GRANULOMATOUS DISEASE, CHRONIC, X-LINKED, INCLUDED                   | Xp21.1-p11.4 |
| #306700 | HEMOPHILIA A; HEMA                                                           |                                                                                            | Xq28         |
| #306900 | HEMOPHILIA B; HEMB                                                           | HEMOPHILIA B(M), INCLUDED                                                                  | Xq27.1       |
| #306955 | HETEROTAXY, VISCERAL, 1, X-LINKED; HTX1                                      | CONGENITAL HEART DEFECTS, MULTIPLE TYPES, 1, X-LINKED, INCLUDED; CHTD1, INCLUDED           | Xq26.3       |
| #307000 | HYDROCEPHALUS DUE TO CONGENITAL STENOSIS OF AQUEDUCT OF SYLVIVUS; HSAS       | HYDROCEPHALUS, X-LINKED, WITH CONGENITAL IDIOPATHIC INTESTINAL PSEUDOObSTRUCTION, INCLUDED | Xq28         |
| #307030 | GLYCEROL KINASE DEFICIENCY; GKD                                              |                                                                                            | Xp21.2       |
| #307150 | HYPERTRICHOSIS, CONGENITAL GENERALIZED; HTC2                                 |                                                                                            | Xq27.1       |
| #307200 | ISOLATED GROWTH HORMONE DEFICIENCY, TYPE III, WITH AGAMMAGLOBULINEMIA; IGHD3 |                                                                                            | Xq22.1       |
| #307700 | HYPOPARATHYROIDISM, X-LINKED; HYPX                                           |                                                                                            | Xq27.1       |

|         |                                                                                    |                                             |         |
|---------|------------------------------------------------------------------------------------|---------------------------------------------|---------|
| #307800 | HYPOPHOSPHATEMIC RICKETS, X-LINKED DOMINANT; XLHR                                  |                                             | Xp22.11 |
| #308050 | CONGENITAL HEMIDYSPLASIA WITH ICHTHYOSIFORM ERYTHRODERMA AND LIMB DEFECTS          |                                             | Xq28    |
| #308100 | ICHTHYOSIS, X-LINKED; XLI                                                          | ICHTHYOSIS, X-LINKED, COMPLICATED, INCLUDED | Xp22.31 |
| #308205 | IFAP SYNDROME 1, WITH OR WITHOUT BRESHECK SYNDROME; IFAP1                          |                                             | Xp22.12 |
| #308230 | IMMUNODEFICIENCY WITH HYPER-IgM, TYPE 1; HIGM1                                     |                                             | Xq26.3  |
| #308240 | LYMPHOPROLIFERATIVE SYNDROME, X-LINKED, 1; XLP1                                    |                                             | Xq25    |
| #308300 | INCONTINENTIA PIGMENTI; IP                                                         |                                             | Xq28    |
| #308350 | DEVELOPMENTAL AND EPILEPTIC ENCEPHALOPATHY 1; DEE1                                 |                                             | Xp21.3  |
| #308700 | HYPOGONADOTROPIC HYPOGONADISM 1 WITH OR WITHOUT ANOSMIA; HH1                       |                                             | Xp22.31 |
| #308800 | KERATOSIS FOLLICULARIS SPINULOSA DECALVANS, X-LINKED; KFSDX                        |                                             | Xp22.12 |
| #308940 | LEIOMYOMATOSIS, DIFFUSE, WITH ALPORT SYNDROME; DL-ATS                              |                                             |         |
| #308990 | PROTEINURIA, LOW MOLECULAR WEIGHT, WITH HYPERCALCIURIA AND NEPHROCALCINOSIS        |                                             | Xp11.23 |
| #309000 | LOWE OCULOCEREBRORENAL SYNDROME; OCRL                                              |                                             | Xq26.1  |
| #309120 | SPERMATOGENIC FAILURE, X-LINKED, 2; SPGFX2                                         |                                             | Xq13.1  |
| #309300 | MEGALOCORNEA; MGC1                                                                 |                                             | Xq23    |
| #309350 | MELNICK-NEEDLES SYNDROME; MNS                                                      |                                             | Xq28    |
| #309400 | MENKES DISEASE; MNK                                                                |                                             | Xq21.1  |
| #309500 | RENPENNING SYNDROME 1; RENS1                                                       |                                             | Xp11.23 |
| #309510 | PARTINGTON X-LINKED MENTAL RETARDATION SYNDROME; PRTS                              |                                             | Xp21.3  |
| #309520 | INTELLECTUAL DEVELOPMENTAL DISORDER, X-LINKED, SYNDROMIC, LUJAN-FRYNS TYPE; MRXSLF |                                             | Xq13.1  |
| #309530 | MENTAL RETARDATION, X-LINKED 1; MRX1                                               |                                             | Xp11.22 |
| #309541 | METHYLMALONIC ACIDEMIA AND HOMOCYSTEINEMIA, cbIX TYPE                              |                                             | Xq28    |
| #309548 | MENTAL RETARDATION, X-LINKED, ASSOCIATED WITH FRAGILE SITE FRAXE                   |                                             | Xq28    |
| #309549 | MENTAL RETARDATION, X-LINKED 9; MRX9                                               |                                             | Xp11.23 |
| #309580 | MENTAL RETARDATION-HYPOTONIC FACIES SYNDROME, X-LINKED, 1; MRXHF1                  |                                             | Xq21.1  |

|         |                                                                                              |                                                                                |              |
|---------|----------------------------------------------------------------------------------------------|--------------------------------------------------------------------------------|--------------|
| #309583 | MENTAL RETARDATION, X-LINKED, SYNDROMIC, SNYDER-ROBINSON TYPE; MRXSSR                        |                                                                                | Xp22.11      |
| #309585 | WILSON-TURNER X-LINKED MENTAL RETARDATION SYNDROME; WTS                                      |                                                                                | Xq12         |
| #309590 | MENTAL RETARDATION, X-LINKED, SYNDROMIC, TURNER TYPE; MRXST                                  |                                                                                | Xp11.22      |
| #309630 | METACARPAL 4-5 FUSION; MF4                                                                   |                                                                                | Xq21.1       |
| #309800 | MICROPHTHALMIA, SYNDROMIC 1; MCOPS1                                                          |                                                                                | Xq28         |
| #309801 | LINEAR SKIN DEFECTS WITH MULTIPLE CONGENITAL ANOMALIES 1; LSDMCA1                            |                                                                                | Xp22.2       |
| #309900 | MUCOPOLYSACCHARIDOSIS, TYPE II; MPS2                                                         |                                                                                | Xq28         |
| #310200 | MUSCULAR DYSTROPHY, DUCHENNE TYPE; DMD                                                       |                                                                                | Xp21.2-p21.1 |
| #310300 | EMERY-DREIFUSS MUSCULAR DYSTROPHY 1, X-LINKED; EDMD1                                         |                                                                                | Xq28         |
| #310400 | MYOPATHY, CENTRONUCLEAR, X-LINKED; CNMX                                                      |                                                                                | Xq28         |
| #310440 | MYOPATHY, X-LINKED, WITH EXCESSIVE AUTOPHAGY; MEAX                                           |                                                                                | Xq28         |
| #310468 | NEPHROLITHIASIS, X-LINKED RECESSIVE, WITH RENAL FAILURE; XRN                                 |                                                                                | Xp11.23      |
| #310490 | CHARCOT-MARIE-TOOTH DISEASE, X-LINKED RECESSIVE, 4, WITH OR WITHOUT CEREBELLAR ATAXIA; CMTX4 |                                                                                | Xq26.1       |
| #310500 | NIGHT BLINDNESS, CONGENITAL STATIONARY, TYPE 1A; CSNB1A                                      | NYCTALOPIA, INCLUDED                                                           | Xp11.4       |
| #310600 | NORRIE DISEASE; ND                                                                           |                                                                                | Xp11.3       |
| #310700 | NYSTAGMUS 1, CONGENITAL, X-LINKED; NYS1                                                      | NYSTAGMUS, INFANTILE PERIODIC ALTERNATING, X-LINKED, INCLUDED; XIPAN, INCLUDED | Xq26.2       |
| #311070 | CHARCOT-MARIE-TOOTH DISEASE, X-LINKED RECESSIVE, 5; CMTX5                                    |                                                                                | Xq22.3       |
| #311200 | OROFACIODIGITAL SYNDROME I; OFD1                                                             |                                                                                | Xp22.2       |
| #311250 | ORNITHINE TRANSCARBAMYLASE DEFICIENCY, HYPERAMMONEMIA DUE TO                                 |                                                                                | Xp11.4       |
| #311300 | OTOPALATODIGITAL SYNDROME, TYPE I; OPD1                                                      | OTOPALATODIGITAL SPECTRUM DISORDER, INCLUDED                                   | Xq28         |
| #311360 | PREMATURE OVARIAN FAILURE 1; POF1                                                            |                                                                                | Xq27.3       |
| #311510 | WAISMAN SYNDROME; WSMN                                                                       |                                                                                | Xq28         |
| #311900 | TARP SYNDROME; TARPS                                                                         |                                                                                | Xp11.3       |
| #312000 | PANHYPOPITUITARISM, X-LINKED; PHPX                                                           |                                                                                | Xq27.1       |
| #312060 | PROPERDIN DEFICIENCY, X-LINKED; CFPD                                                         | PROPERDIN DEFICIENCY, TYPE II, INCLUDED                                        | Xp11.23      |

|         |                                                                              |                                                           |                                                                                                                                        |
|---------|------------------------------------------------------------------------------|-----------------------------------------------------------|----------------------------------------------------------------------------------------------------------------------------------------|
| #312080 | PELIZAEUS-MERZBACHER DISEASE;<br>PMD                                         |                                                           | Xq22.2                                                                                                                                 |
| #312170 | PYRUVATE DEHYDROGENASE E1-<br>ALPHA DEFICIENCY; PDHAD                        | LACTIC ACIDEMIA, THIAMINE-<br>RESPONSIVE, INCLUDED        | Xp22.12                                                                                                                                |
| #312300 | ANDROGEN INSENSITIVITY,<br>PARTIAL; PAIS                                     |                                                           | Xq12                                                                                                                                   |
| #312600 | RETINITIS PIGMENTOSA 2; RP2                                                  |                                                           | Xp11.3                                                                                                                                 |
| #312700 | RETINOSCHISIS 1, X-LINKED,<br>JUVENILE; RS1                                  |                                                           | Xp22.13                                                                                                                                |
| #312750 | RETT SYNDROME; RTT                                                           | RETT SYNDROME, ZAPPELLA<br>VARIANT, INCLUDED              | Xq28                                                                                                                                   |
| #312863 | COMBINED IMMUNODEFICIENCY, X-<br>LINKED; CIDX                                |                                                           | Xq13.1                                                                                                                                 |
| #312870 | SIMPSON-GOLABI-BEHMEL<br>SYNDROME, TYPE 1; SGBS1                             |                                                           | Xq26.2                                                                                                                                 |
| #312920 | SPASTIC PARAPLEGIA 2, X-LINKED;<br>SPG2                                      |                                                           | Xq22.2                                                                                                                                 |
| #313200 | SPINAL AND BULBAR MUSCULAR<br>ATROPHY, X-LINKED 1; SMAX1                     |                                                           | Xq12                                                                                                                                   |
| #313400 | SPONDYLOEPIPHYSEAL DYSPLASIA<br>TARDA, X-LINKED; SEDT                        |                                                           | Xp22.2                                                                                                                                 |
| #313500 | TOOTH AGENESIS, SELECTIVE, X-<br>LINKED, 1; STHAGX1                          |                                                           | Xq13.1                                                                                                                                 |
| #313900 | THROMBOCYTOPENIA 1; THC1                                                     | THROMBOCYTOPENIA, X-<br>LINKED, INTERMITTENT,<br>INCLUDED | Xp11.23                                                                                                                                |
| #314050 | THROMBOCYTOPENIA WITH BETA-<br>THALASSEMIA, X-LINKED; XLTT                   |                                                           | Xp11.23                                                                                                                                |
| #314250 | DYSTONIA 3, TORSION, X-LINKED;<br>DYT3                                       |                                                           | Xq13.1                                                                                                                                 |
| #314390 | VACTERL ASSOCIATION, X-LINKED,<br>WITH OR WITHOUT<br>HYDROCEPHALUS; VACTERLX |                                                           | Xq26.3                                                                                                                                 |
| #314400 | CARDIAC VALVULAR DYSPLASIA, X-<br>LINKED; CVD1                               |                                                           | Xq28                                                                                                                                   |
| #314580 | WIEACKER-WOLFF SYNDROME;<br>WRWF                                             |                                                           | Xq11.2                                                                                                                                 |
| #249700 | LANGER MESOMELIC DYSPLASIA;<br>LMD                                           |                                                           | Xp22.33,<br>Yp11.2                                                                                                                     |
| #300000 | OPITZ GBBB SYNDROME, TYPE I;<br>GBBB1                                        |                                                           | Xp22.2                                                                                                                                 |
| #300004 | CORPUS CALLOSUM, AGENESIS OF,<br>WITH ABNORMAL GENITALIA                     |                                                           | Xp21.3                                                                                                                                 |
| #611162 | MALARIA, SUSCEPTIBILITY TO                                                   | MALARIA, RESISTANCE TO,<br>INCLUDED                       | 1q23.2,<br>1q23.3,<br>1q23.3,<br>1q32.2,<br>2q14.3,<br>3p21.2,<br>4q31.21,<br>4q31.21,<br>6p21.33,<br>7q21.11,<br>11p15.4,<br>11q24.2, |



|               |                                                                            |                                                                  | 17q11.2,<br>17q21.31,<br>19p13.2,<br>Xq28 |
|---------------|----------------------------------------------------------------------------|------------------------------------------------------------------|-------------------------------------------|
| MIM<br>Number | Title                                                                      | Included Titles                                                  | Cytogenetic<br>Location                   |
| #127300       | LERI-WEILL DYSCHONDROSTEOSIS;<br>LWD                                       | MADELUNG DEFORMITY,<br>INCLUDED                                  | Xp22.33,<br>Yp11.2                        |
| #300009       | DENT DISEASE 1                                                             |                                                                  | Xp11.23                                   |
| #300018       | 46,XY SEX REVERSAL 2; SRXY2                                                |                                                                  | Xp21.2                                    |
| #300029       | RETINITIS PIGMENTOSA 3; RP3                                                |                                                                  | Xp11.4                                    |
| #300048       | INTESTINAL PSEUDOObSTRUCTION,<br>NEURONAL, CHRONIC IDIOPATHIC,<br>X-LINKED | CONGENITAL SHORT BOWEL<br>SYNDROME, X-LINKED,<br>INCLUDED - FLNA | Xq28                                      |

<sup>a</sup>Titles as listed verbatim in OMIM.

**References:**

1. Ben-Shachar, R., Svenson, A., Goldberg, J. D. & Muzzey, D. A data-driven evaluation of the size and content of expanded carrier screening panels. *Genet. Med.* **21**, 1931-1939 (2019).
2. Guo, M. H. & Gregg, A. R. Estimating yields of prenatal carrier screening and implications for design of expanded carrier screening panels. *Genet. Med.* **21**, 1940-1947 (2019).
3. Lek, M. et al. Analysis of protein-coding genetic variation in 60,706 humans. *Nature.* **536**, 285-291 (2016).
